# Supplementary material
Source: publisher site journal article supplement (https://www.dovepress.com/get_supplementary_file.php?f=224618.xlsx)
Supplement: Supplementary file 1 [file get_supplementary_file.php]

## Sheet: Sheet1
Suppl file 1-Body weight
WEEK12	CON1	CON2	CON3	CON4	CON5	CON6	CON7	CON8	GLU1	GLU2	GLU3	GLU4	GLU5	GLU6	GLU7	GLU＋ASP1	GLU＋ASP2	GLU＋ASP3	GLU＋ASP4	GLU＋ASP5	GLU＋ASP6	GLU＋ASP7	GLU＋ASP8	GLU＋HYD1	GLU＋HYD2	GLU＋HYD3	GLU＋HYD4	GLU＋HYD5	GLU＋HYD6	GLU＋HYD7	GLU＋HYD8
Body Weight	336.6	298.6	301.5	271.2	259.3	278.2	281.4	270.2	310.3	287.3	318.4	271.4	306.3	270.3	292.4	276.4	347.8	286.3	281.3	279.4	285.3	293.4	294.6	270.8	285.3	289.3	276.7	310.3	279.3	270.8	298.6
WEEK16	CON1	CON2	CON3	CON4	GLU1	GLU2	GLU3	GLU4	GLU＋ASP1	GLU＋ASP2	GLU＋ASP3	GLU＋ASP4	GLU＋HYD1	GLU＋HYD2	GLU＋HYD3	GLU＋HYD4	GLU＋HYD5
Body Weight	265.2	284.3	289.3	321.5	284.7	304.8	301.8	329.3	333.7	290.5	302.1	294.3	290.5	293.3	289.4	294.8	305.7
Suppl file 2-Nodules and Max Diameter
ＷＥＥＫ１２
	CON1	CON2	CON3	GLU1	GLU2	GLU3	GLU+ASP1	GLU+ASP2	GLU+ASP3	GLU+HYD1	GLU+HYD2	GLU+HYD3
final nodule number	52	63	60	62	52	64	10	10	34	2	40	10
Dr.1	53	64	61	63	53	65	10	10	33	2	40	10
Dr.2	52	63	59	59	51	64	10	10	34	2	40	10
Dr.3	52	62	60	64	52	64	10	10	34	2	39	10
average	52.3333	63	60	62	52	64.3333	10	10	33.6667	2	39.6667	10
final maximum diameter	4mm	5mm	4mm	4mm	4mm	4mm	2mm	1mm	2mm	1mm	3mm	2mm
Dr.1	4	5	4	4	4	4	2	1	2	1	3	3	（ｍｍ）
Dr.2	4	6	4	4	4	4	2	1	2	1	3	2	（ｍｍ）
Dr.3	4	5	4	4	4	4	2	1	2	1	3	2	（ｍｍ）
average	4	5.33333	4	4	4	4	2	1	2	1	3	2.33333	（ｍｍ）
ＷＥＥＫ１６
	CON1	CON2	CON3	CON4	GLU1	GLU2	GLU3	GLU4	GLU+ASP1	GLU+ASP2	GLU+ASP3	GLU+ASP4	GLU+HYD1	GLU+HYD2	GLU+HYD3	GLU+HYD4	GLU+HYD5
final nodule number	163	167	170	168	160	156	157	160	123	87	114	107	98	102	113	80	95
Dr.1	163	166	170	168	160	156	157	160	123	87	114	107	98	102	113	80	95
Dr.2	164	167	170	168	160	157	158	160	123	87	113	108	98	102	113	80	95
Dr.3	163	167	170	168	161	156	157	160	123	87	114	107	98	102	113	80	95
average	163.333	166.667	170	168	160.333	156.333	157.333	160	123	87	113.667	107.333	98	102	113	80	95
final maximum diameter	15mm	10mm	12mm	12mm	14mm	11mm	12mm	14mm	15mm	7mm	8mm	10m	7mm	8mm	8mm	6mm	8mm
Dr.1	15	10	12	12	14	11	12	14	15	7	8	10	7	8	8	6	8	（ｍｍ）
Dr.2	15	10	12	12	14	11	12	14	15	8	8	10	7	8	8	7	8	（ｍｍ）
Dr.3	15	10	12	12	15	11	12	14	15	7	8	10	7	8	8	6	8	（ｍｍ）
average	15	10	12	12	14.3333	11	12	14	15	7.33333	8	10	7	8	8	6.33333	8	（ｍｍ）
Suppl file 3-CD68 CD206 and MVD
CD68
WEEK １２
	CON1	CON2	CON3	GLU1	GLU2	GLU3		GLU+ASP1	GLU+ASP2	GLU+ASP3		GLU+HYD1	GLU+HYD2	GLU+HYD3
	28	28	29	25	26	26		28	30	28		25	26	25
	25	26	28	28	30	28		30	24	32		19	22	21
	28	30	30	28	28	26		21	28	26		26	21	26
	26	29	27	30	25	29		26	26	25		23	27	28
	29	28	25	30	28	30		26	25	29		28	21	25
	26	30	25	29	31	29		23	28	29		23	19	25
	28	25	28	28	26	25		28	27	30		27	24	26
	24	26	27	29	24	30		26	26	26		20	26	25
	29	31	29	29	29	27		29	28	24		25	23	22
	29	29	30	26	27	28		25	24	31		26	25	27
average	27.2	28.2	27.8	28.2	27.4	27.8		26.2	26.6	28		24.2	23.4	25
WEEK １６
	CON1	CON2	CON3	CON4	GLU1	GLU2	GLU3	GLU4	GLU+ASP1	GLU+ASP2	GLU+ASP3	GLU+ASP4	GLU+HYD1	GLU+HYD2	GLU+HYD3	GLU+HYD4	GLU+HYD5
	26	28	29	29	28	27	28	26	29	28	28	30	28	29	30	26	29
	30	29	29	28	26	29	30	31	30	26	27	27	26	26	28	28	26
	28	26	30	29	27	30	22	27	29	29	30	25	28	30	26	26	31
	28	30	30	29	30	28	29	28	28	30	27	28	30	28	29	29	28
	28	29	29	27	31	27	35	29	28	28	26	29	29	26	25	27	27
	31	29	29	28	29	30	31	29	30	27	26	26	29	28	28	25	27
	28	28	31	25	33	22	28	30	25	30	28	26	32	26	27	29	26
	26	26	26	27	27	28	28	28	32	30	30	30	31	27	30	27	29
	27	27	33	30	28	33	29	29	29	26	28	28	26	30	23	24	28
	28	32	28	32	25	28	28	25	28	28	26	29	23	28	30	31	31
average	28	28.4	29.4	28.4	28.4	28.2	28.8	28.2	28.8	28.2	27.6	27.8	28.2	27.8	27.6	27.2	28.2
CD206
WEEK １２
	CON1	CON2	CON3	GLU1	GLU2	GLU3	GLU+ASP1	GLU+ASP2	GLU+ASP3	GLU+HYD1	GLU+HYD2	GLU+HYD3
	18	15	21	19	19	12	13	21	14	15	17	16
	19	20	18	18	14	16	18	16	20	14	18	11
	18	16	16	20	18	19	20	18	18	16	16	18
	20	19	15	19	20	21	18	19	19	16	16	15
	16	19	20	16	20	19	17	14	18	15	11	18
	16	13	20	18	19	19	15	16	20	19	14	17
	18	17	19	20	19	18	16	16	16	15	16	20
	20	20	19	17	19	13	20	19	14	12	12	17
	21	18	14	18	16	17	16	20	20	18	19	13
	16	21	18	19	18	20	19	17	19	12	17	11
average	18.2	17.8	18	18.4	18.2	17.4	17.2	17.6	17.8	15.2	15.6	15.6
WEEK １６
	CON1	CON2	CON3	CON4	GLU1	GLU2	GLU3	GLU4	GLU+ASP1	GLU+ASP2	GLU+ASP3	GLU+ASP4	GLU+HYD1	GLU+HYD2	GLU+HYD3	GLU+HYD4	GLU+HYD5
	19	17	18	17	20	18	16	18	18	19	18	19	18	17	20	16	18
	16	18	21	18	16	15	19	20	17	19	16	18	19	16	15	18	17
	18	16	18	22	19	21	20	16	20	20	17	17	14	20	16	17	19
	18	23	15	16	16	16	17	18	16	17	19	18	20	19	18	20	18
	21	18	19	20	20	19	19	20	19	16	18	16	17	17	17	16	19
	17	19	16	18	19	17	15	18	17	18	21	18	16	15	14	20	17
	20	20	19	19	14	20	21	17	19	16	13	22	19	21	20	16	20
	15	17	23	18	19	19	18	20	18	22	15	15	18	20	16	18	16
	19	16	17	17	19	16	16	17	20	15	19	16	18	19	16	17	21
	21	20	16	21	20	17	21	20	16	20	20	17	17	14	20	16	17
average	18.4	18.4	18.2	18.6	18.2	17.8	18.2	18.4	18	18.2	17.6	17.6	17.6	17.8	17.2	17.4	18.2
MVD（CD34+ vessel）
WEEK １２
	CON1	CON2	CON3	GLU1	GLU2	GLU3		GLU+ASP1	GLU+ASP2	GLU+ASP3		GLU+HYD1	GLU+HYD2	GLU+HYD3
	8	8	7	9	3	4		3	4	2		1	5	3
	9	7	9	7	4	3		3	3	4		2	4	2
	3	4	2	3	4	5		2	3	3		0	1	2
	7	3	4	3	5	3		4	2	2		3	0	1
	3	3	3	3	4	7		1	0	1		1	3	0
average	6	5	5	5	4	4.4		2.6	2.4	2.4		1.4	2.6	1.6
ＷＥＥＫ １６
	CON1	CON2	CON3	CON4	GLU1	GLU2	GLU3	GLU4	GLU+ASP1	GLU+ASP2	GLU+ASP3	GLU+ASP4	GLU+HYD1	GLU+HYD2	GLU+HYD3	GLU+HYD4	GLU+HYD5
	13	21	13	14	21	18	16	18	10	12	10	9	12	5	10	10	5
	14	10	21	15	12	10	15	16	12	14	8	10	11	8	12	11	14
	13	10	18	20	20	11	10	13	10	10	13	6	10	9	14	13	12
	16	9	16	18	19	15	14	16	14	8	9	7	10	6	11	6	10
	12	20	10	10	20	14	12	10	15	19	12	8	14	5	13	10	9
average	13.6	14	15.6	15.4	18.4	13.6	13.4	14.6	12.2	12.6	10.4	8	11.4	6.6	12	10	10
Suppl file 4-WesternBlot WEEK12
First
IOD of WEEK 12
	CON1	CON2	CON3	GLU1	GLU2	GLU3		GLU＋ASP1	GLU＋ASP2	GLU＋ASP3		GLU＋HYD1	GLU＋HYD2	GLU＋HYD3
GAPDH	284.53	294.36	194.28	296.53	252.9	280.38		227.29	258.46	231.32		396.29	294.37	268.34
IL-10	313.64	324.93	309.37	305.73	290.47	272.273		130.55	132.53	146.23		262.9	124.34	153.89
	1.1023	1.1039	1.5924	1.031	1.1486	0.9711		0.5744	0.5128	0.6322		0.6634	0.4224	0.5735
TGF-β	124.75	130.73	109.46	139.42	65.269	129.45		158.41	69.52	43.397		58.029	53.76	72.382
	0.4384	0.3524	0.5634	0.4702	0.2581	0.4617		0.697	0.4387	0.3305		0.1464	0.1826	0.2697
HGF	43.96	49.53	50.62	69.58	51.706	63.571		62.074	32.64	25.431		49.54	33.61	34.41
	0.1545	0.1683	0.2606	0.2346	0.2045	0.2267		0.2731	0.1263	0.1099		0.125	0.1142	0.1282
P65	73.74	71.49	90.45	69.42	67.237	46.049		50.6	65.31	52.684		74.3	56.43	43.06
	0.2592	0.2429	0.4656	0.2341	0.2659	0.1642		0.2226	0.2527	0.2278		0.1874	0.1917	0.1605
GAPDH	201.65	213.56	238.54	198.47	201.43	210.43		189.54	208.54	215.48		238.54	214.54	225.63
TNF-α	497.63	505.73	512.75	504.76	463.87	453.72		385.74	489.03	465.32		239.54	276.54	306.74
	2.4678	2.3681	2.1495	2.5433	2.3029	2.1562		2.0351	2.345	2.1595		1.0042	1.289	1.3595
Second
IOD of WEEK 12
	CON1	CON2	CON3	GLU1	GLU2	GLU3		GLU＋ASP1	GLU＋ASP2	GLU＋ASP3		GLU＋HYD1	GLU＋HYD2	GLU＋HYD3
GAPDH	730.52	749.42	694.73	702.58	782.38	697.22		648.2	674.35	578.66		519.34	504.39	436.88
HGF	30.58	41.52	36.48	26.43	19.461	19.002		49.71	14.73	16.729		10.553	11.48	9.9663
	0.0419	0.0554	0.0525	0.0376	0.0249	0.0273		0.0767	0.0218	0.0289		0.0203	0.0228	0.0228
TGF-β	201.64	215.87	225.75	235.87	316.48	145.97		137.43	98.54	87.43		107.45	116.43	98.54
	0.276	0.288	0.3249	0.3357	0.4045	0.2094		0.212	0.1461	0.1511		0.2069	0.2308	0.2256
IL-10	125.76	145.74	201.85	114.65	108.54	104.67		98.45	97.54	103.75		95.43	67.65	75.43
	0.1722	0.1945	0.2905	0.1632	0.1387	0.1501		0.1512	0.1446	0.1793		0.1838	0.1341	0.1727
P65	89.45	96.43	109.56	78.65	69.54	69.45		65.43	64.76	75.32		39.43	38.62	37.45
	0.1224	0.1288	0.1577	0.1119	0.0889	0.0996		0.101	0.096	0.1302		0.0759	0.0766	0.0857
GAP	174.82	194.62	201.58	158.37	181.73	134.77		142.42	196.48	296.6		329.11	189.47	382.49
TNF-α	505.3	516.54	498.51	496.47	501.28	410.53		490.12	384.36	568.016		169.23	165.38	162.72
	2.8904	2.6541	2.473	3.1349	2.7584	3.046		3.44	1.9562	1.9151		0.514	0.8729	0.425
Third	IOD of WEEK 12
	CON1	CON2	CON3	GLU1	GLU2	GLU3		GLU＋ASP1	GLU＋ASP2	GLU＋ASP3		GLU＋HYD1	GLU＋HYD2	GLU＋HYD3
GAPDH	238.65	345.76	298.54	365.43	446.74	120.11		294.64	163.89	239.41		168.26	164.73	146.85
HGF	23.58	29.37	30.21	49.32	45.98	20.41		10.74	11.64	13.62		9.32	8.04	9.56
	0.0989	0.085	0.1012	0.135	0.1029	0.1699		0.0365	0.071	0.0569		0.0554	0.0488	0.0651
TGF-β	124.76	156.78	165.32	223.85	271.42	76.48		128.43	76.26	180.42		35.42	29.41	28.1
	0.5228	0.4534	0.5538	0.6126	0.6076	0.6367		0.4359	0.4653	0.7536		0.2105	0.1785	0.1914
IL-10	179.38	156.32	183.64	228.35	236.92	89.53		104.32	98.54	154.89		46.89	49.32	34.23
	0.7516	0.4521	0.6151	0.6249	0.5303	0.7454		0.3541	0.6013	0.647		0.2787	0.2994	0.2331
P65	89.43	87.43	90.42	128.53	159.62	52.76		104.38	43.75	90.42		33.74	23.32	21.64
	0.3747	0.2529	0.3029	0.3517	0.3573	0.4393		0.3543	0.2669	0.3777		0.2005	0.1416	0.1474
GAPDH	305.64	278.42	307.41	298.43	287.41	379.25		298.42	317.76	301.63		246.63	191.8	206.21
TNF-α	408.13	378.54	369.42	278.64	312.74	289.53		301.53	306.42	295.41		201.43	178.46	195.31
	1.3353	1.3596	1.2017	0.9337	1.0881	0.7634		1.0104	0.9643	0.9794		0.8167	0.9304	0.9471
First
Week 12	CON1	CON2	CON3	GLU1	GLU2	GLU3		GLU+ASP1	GLU+ASP2	GLU+ASP3		GLU+HYD1	GLU+HYD2	GLU+HYD3
VEGF	90080	90746	90792	96879	98191	98586		102609	101625	100549		51426	49782	47972
P38	37495	38235	37855	34792	35618	35529		33055	31822	32206		34675	34948	34956
P-P38	149018	153950	157611	159774	160921	163115		152394	154846	155934		37100	37896	38006
GAPDH	165605	161508	165928	162295	161668	169960		165055	170468	165492		164200	167998	167318
Second
Week 12	CON1	CON2	CON3	GLU1	GLU2	GLU3		GLU+ASP1	GLU+ASP2	GLU+ASP3		GLU+HYD1	GLU+HYD2	GLU+HYD3
VEGF	105816	103740	108457	100265	102158	103205		106582	108214	97462		55421	52016	50884
P38	29825	32150	31476	32015	28954	31548		33698	35120	31897		32357	31586	31226
P-P38	155230	150841	159574	149564	157845	154258		161354	159820	160245		32500	38046	39851
GAPDH	170241	168943	169084	173521	168955	170325		166874	169846	169521		170236	171125	169870
Third
Week 12	CON1	CON2	CON3	GLU1	GLU2	GLU3		GLU+ASP1	GLU+ASP2	GLU+ASP3		GLU+HYD1	GLU+HYD2	GLU+HYD3
VEGF	90783	90297	90847	98026	97263	98345		108296	99287	108973		51043	48328	52122
P38	37983	37592	38084	35488	35108	35581		32591	31823	33109		34892	34728	35103
P-P38	155985	152183	157018	162847	160481	162522		155287	153178	156872		37993	37386	38139
GAPDH	162278	164855	165228	167874	162019	168020		164820	163200	167641		164482	165980	167784
Suppl file 5-WesternBlot WEEK16
First
IOD of WEEK 16
	CON1	CON2	CON3	CON4	GLU1	GLU2	GLU3	GLU4	GLU+ASP1	GLU+ASP2	GLU+ASP3	GLU+ASP4	GLU+HYD1	GLU+HYD2	GLU+HYD3	GLU+HYD4	GLU+HYD5
GAPDH	203.54	198.46	226.73	216.37	245.63	243.97	262.24	249.65	255.017	280.43	320.67	205.56	416.18	264.86	205.55	245.38	321.16
P65	83.72	79.41	69.45	72.53	93.42	90.35	104.11	68.54	79.793	84.63	101.213	83.38	185.39	68.39	58.45	65.75	80.38
	0.41132	0.400131	0.306311	0.335213	0.380328	0.370332	0.397003	0.274544	0.312893	0.301787	0.31563	0.405624	0.445456	0.258212	0.284359	0.267952	0.25028
TGF	284.62	304.71	381.74	347.42	305.52	252.07	374.47	306.75	241.44	384.51	310.26	234.25	328.84	349.46	228.61	278.74	392.64
	1.39835	1.53537	1.68368	1.60568	1.24382	1.0332	1.42797	1.22872	0.94676	1.37114	0.967537	1.13957	0.790139	1.31941	1.11219	1.13595	1.22257
IL-10	104.82	125.75	109.48	138.41	206.73	115.626	250.2	169.54	56.347	294.63	76.592	221.53	259.07	153.68	142.33	264.43	312.42
	0.514985	0.633629	0.482865	0.639691	0.841632	0.473935	0.954088	0.679111	0.220954	1.05064	0.23885	1.07769	0.622495	0.580231	0.692435	1.07763	0.972786
HGF	23.79	30.42	21.64	24.84	19.68	20.41	43.53	22.37	15.32	26.31	22.32	19.38	36.52	25.21	29.43	25.42	28.54
	0.116881	0.15328	0.0954439	0.114803	0.0801205	0.0836578	0.165993	0.0896054	0.0600744	0.0938202	0.0696043	0.094279	0.0877505	0.0951824	0.143177	0.103594	0.0888654
GAPDH	489.32	476.53	483.21	469.52	501.32	398.52	387.51	365.43	476.58	498.21	483.62	378.53	475.21	501.83	396.41	379.53	368.45
TNF-α	179.42	185.32	169.41	174.38	189.41	156.46	147.32	115.26	107.43	98.52	153.69	147.85	158.36	168.43	147.32	133.43	151.75
	0.3667	0.3889	0.3506	0.371401	0.377823	0.392603	0.380171	0.315409	0.2254	0.1977	0.3178	0.39059	0.333242	0.335632	0.371635	0.351566	0.41186
Second
IOD of WEEK 16
	CON1	CON2	CON3	CON4	GLU1	GLU2	GLU3	GLU4	GLU+ASP1	GLU+ASP2	GLU+ASP3	GLU+ASP4	GLU+HYD1	GLU+HYD2	GLU+HYD3	GLU+HYD4	GLU+HYD5
GAPDH	479.46	459.61	501.42	469.27	486.83	470.14	482.31	468.94	493.41	496.24	452.54	465.36	304.39	427.49	480.54	456.74	485.43
TNF-α	149.27	150.52	147.48	146.29	136.85	122.47	157.111	152.43	102.77	94.73	52.821	62.74	103.52	104.72	89.42	102.54	96.52
	0.3113	0.3274	0.2941	0.31174	0.2811	0.2605	0.325747	0.325052	0.2083	0.1909	0.1149	0.13482	0.3401	0.245	0.1861	0.224504	0.198834
GAPDH	459.25	461.73	396.76	432.76	469.38	401.55	574.96	465.92	608.99	596.35	606.53	587.53	469.41	493.84	299.16	332.45	378.52
HGF	28.43	29.41	27.46	30.61	27.43	21.139	29.708	42.75	43.215	45.42	30.337	41.54	38.261	30.47	28.288	24.42	21.73
	0.0619	0.064	0.0548	0.070732	0.0584	0.0526	0.0516697	0.0917539	0.0709618	0.0761633	0.0500173	0.0707028	0.0815087	0.0617001	0.0945581	0.0734547	0.0574078
TGF	59.21	11.43	109.52	85.36	96.42	22.894	48.805	54.34	82.555	102.47	28.846	87.41	42.035	42.73	30.539	41.64	42.63
	0.1235	0.0249	0.3184	0.197246	0.2054	0.057	0.0849	0.116629	0.1356	0.171829	0.0426	0.148775	0.0895	0.0865	0.1021	0.125252	0.112623
IL-10	205.63	219.47	193.72	205.38	104.36	97.139	262.66	113.65	162.05	201.43	316.06	258.46	287.86	104.32	137.44	114.64	126.63
	0.4478	0.4753	0.4127	0.474582	0.2223	0.242	0.4568	0.243926	0.2661	0.3378	0.5211	0.439909	0.6132	0.2112	0.4594	0.344834	0.33454
P65	167.32	153.72	148.21	133.28	162.84	154.75	192.94	171.64	217.53	189.45	186.48	195.74	105.32	109.26	125.73	115.73	123.59
	0.3643	0.3329	0.3736	0.307977	0.33449	0.329157	0.400033	0.366017	0.440871	0.381771	0.412074	0.420621	0.2244	0.2212	0.4203	0.348112	0.326509
Third
	CON1	CON2	CON3	CON4	GLU1	GLU2	GLU3	GLU4	GLU+ASP1	GLU+ASP2	GLU+ASP3	GLU+ASP4	GLU+HYD1	GLU+HYD2	GLU+HYD3	GLU+HYD4	GLU+HYD5
GAPDH	496.53	503.47	516.43	489.52	486.28	493.52	532.04	465.63	508.22	597.41	489.53	503.82	515.19	477.98	504.32	503.53	521.37
HGF	21.78	20.61	22.18	20.29	19.47	18.6	17.28	16.94	26.73	24.38	20.3	19.34	13.62	14.72	13.62	15.47	16.42
	0.0439	0.0409	0.0429	0.0414488	0.04	0.0377	0.0325	0.0363808	0.0525953	0.0408095	0.0414683	0.0383867	0.0264	0.0308	0.027	0.0307231	0.0314939
TGF	23.51	19.83	20.41	21.43	18.43	17.46	16.73	16.95	15.62	17.42	28.42	17.69	24.72	30.91	25.83	23.26	23.74
	0.0473	0.0394	0.0395	0.0437776	0.0379	0.0354	0.0314	0.0364023	0.0307	0.0292	0.0580557	0.0351117	0.0479823	0.064668	0.0512175	0.0461939	0.0455339
IL-10	198.34	204.82	239.41	216.59	106.42	167.4	184.36	146.48	98.42	114.83	142.89	135.74	89.31	104.72	118.63	114.62	108.53
	0.3995	0.4068	0.4636	0.442454	0.2188	0.3392	0.3465	0.314585	0.1937	0.1922	0.2919	0.269422	0.1734	0.2944	0.2352	0.227633	0.208163
P65	201.43	198.32	89.41	286.37	154.72	169.52	172.84	142.73	167.73	214.63	205.82	196.47	218.53	228.46	217.42	215.63	216.42
	0.4057	0.3939	0.1731	0.585002	0.318171	0.343492	0.324863	0.306531	0.330034	0.359268	0.4204	0.389961	0.4242	0.478	0.4311	0.428237	0.415099
GAPDH	347.48	327.41	301.64	317.48	289.53	401.7	331.5	361.74	201.61	214.78	237.84	214.58	384.55	254.41	268.74	236.74	241.75
TNF-α	125.83	137.31	125.84	137.59	112.63	163.4	124.73	124.64	132.94	116.93	128.4	131.75	98.42	104.73	168.45	115.73	116.73
	0.3621	0.4194	0.4172	0.433382	0.38901	0.406771	0.376259	0.344557	0.6594	0.5444	0.5399	0.61399	0.2559	0.4117	0.6268	0.488849	0.482854
First
Week16	Control1	Control2	Control3	Glu1	Glu2	Glu3	GLU+ASP1	GLU+ASP2	GLU+ASP3	GLU+HYD1	GLU+HYD2	GLU+HYD3
VEGF	119563	120575	120176	117309	120666	122791	126300	126444	124332	116647	119484	121213
P38	32512	31928	31780	42749	37315	42354	34801	35450	35584	41230	41104	39098
P-P38	116435	122077	126480	117960	117155	115882	148800	149454	149824	89946	90180	92024
GAPDH	176229	176129	177540	164378	186273	184870	168477	173844	175569	169956	172956	176003
Second
Week16	Control1	Control2	Control3	Glu1	Glu2	Glu3	GLU+ASP1	GLU+ASP2	GLU+ASP3	GLU+HYD1	GLU+HYD2	GLU+HYD3
VEGF	121421	122154	118786	120684	118821	123122	128741	126642	121147	119974	126542	123247
P38	40215	38951	41247	45684	44128	45471	38472	38657	41549	42136	39814	43247
P-P38	120478	123289	127452	120774	121287	118452	149854	147800	145120	91243	93478	90124
GAPDH	178954	180120	177625	178844	181230	179872	173985	179842	178489	180365	181247	177956
Third
Week16	Control1	Control2	Control3	Glu1	Glu2	Glu3	GLU+ASP1	GLU+ASP2	GLU+ASP3	GLU+HYD1	GLU+HYD2	GLU+HYD3
VEGF	122087	118293	124158	120188	119289	121892	125038	119824	130894	123109	117281	123982
P38	32092	31495	32293	41093	38295	41489	35302	34877	35383	40928	39827	40982
P-P38	124889	117283	125328	117327	115982	117623	149592	148882	149789	93829	88293	95932
GAPDH	175334	173987	177902	165238	180325	181247	170230	174456	174486	170025	173147	175357
